# Supplementary material for: Antibody Generation and Immunogenicity Analysis of EBV gp42 N-Terminal Region
Source: MDPI journal article supplement (doi:10.3390/v13122380), 2021-11-28
Supplement: s1 [file s1]

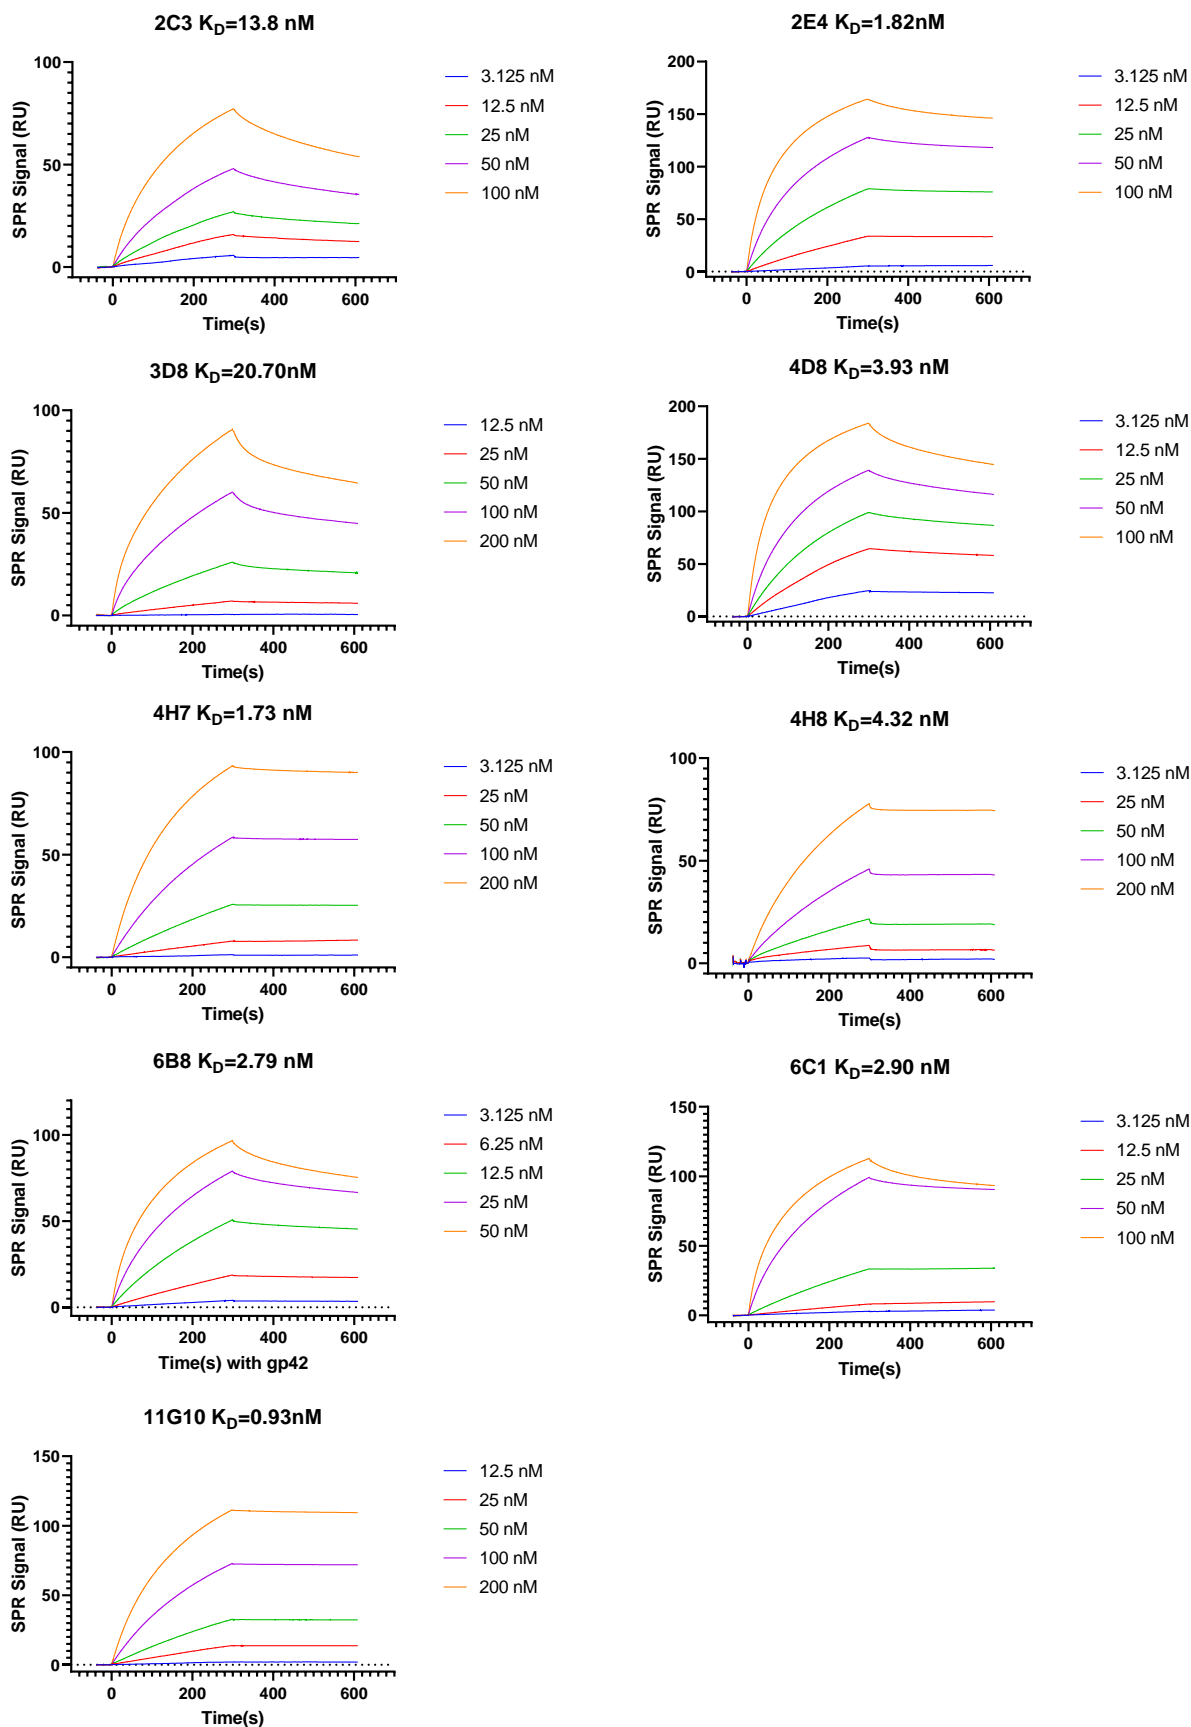

**Figure S1. Binding affinity of 9 mAbs to gp42 conjugated to Sensor Chip CM5.**

**A**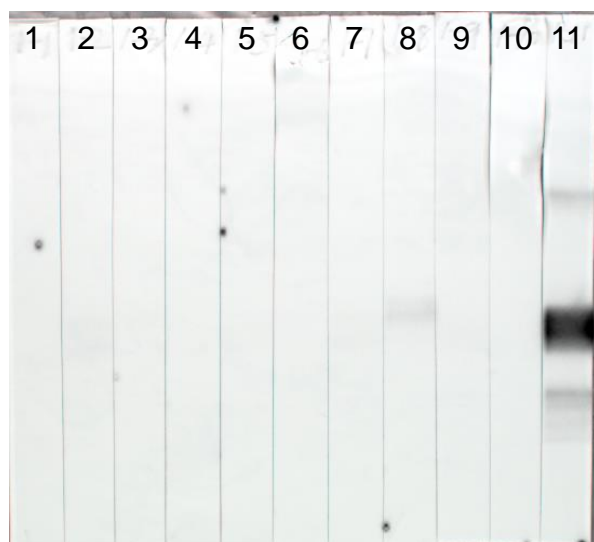

1. 2C3
2. 2E4
3. 3D3
4. 4D8
5. 4H7
6. 4H8
7. 6B8
8. 6C1
9. 11G10
10. 72A1
11. Anti-GST

**B**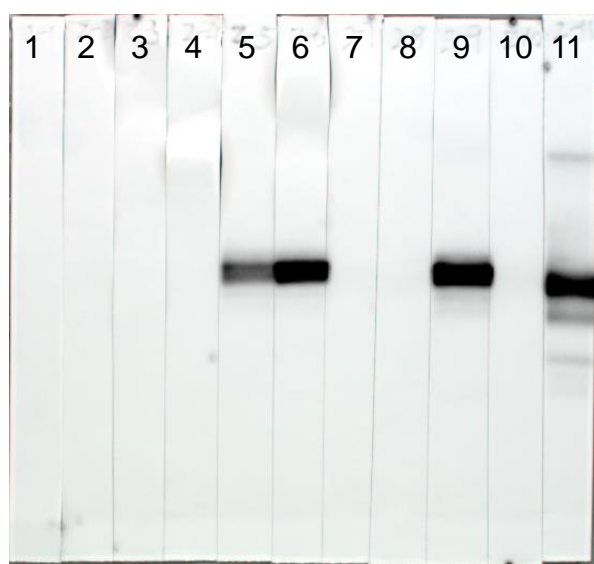

1. 2C3
2. 2E4
3. 3D3
4. 4D8
5. 4H7
6. 4H8
7. 6B8
8. 6C1
9. 11G10
10. 72A1
11. Anti-GST

**C**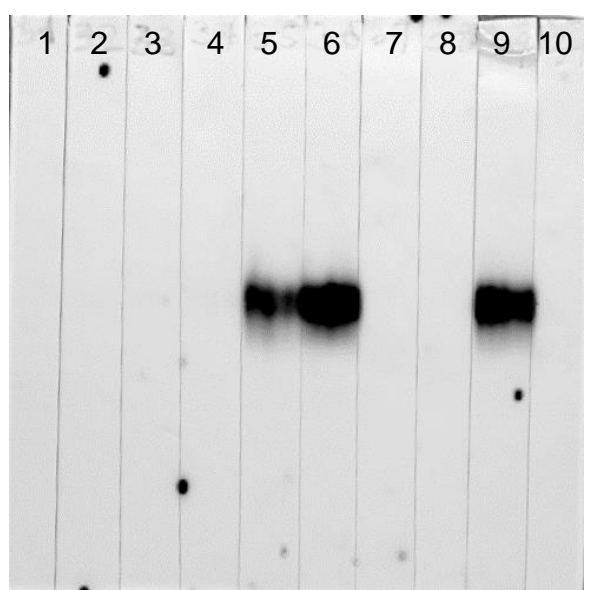

1. 2C3
2. 2E4
3. 3D3
4. 4D8
5. 4H7
6. 4H8
7. 6B8
8. 6C1
9. 11G10
10. 72A1

**Figure S2. Western blot analysis of anti-gp42 mAbs against (A) gp42(residues 44-61), (B) gp42(residues 67-81) and gp42 protein.**

The mAbs used in western blot were listed on the right.

**A**

EBV-gp42:rhLCV-gp42  
Identity= 79.64% (176/221)

|     |                                                               |
|-----|---------------------------------------------------------------|
| 1   | MVSEFKQVRVPLFTAIALVIVLLLAYFLPPRVRGGRVAAAAITWVPKPNVEVWPVDPPPP  |
|     | :     :        .     : .     .:                               |
| 1   | MVSEFKQVRVPLFTALALVIVLLLAYLPPVR.GGQVAAAAITWVANPKVEVWPAEPPPP   |
|     | :     :        .     : .     .:                               |
| 61  | VNFNKTAEQEYGDKEVKLPHWPTLHTFQVPQNYTKANCTYCNTREYTFSYKGCCFYFTK   |
|     | ::     .:.   .     .  :     .     .:.      .                  |
| 60  | IDFNKTAEQEYGKPEIDLPHWKPTLHTFKVPENYTKPNCTYCNTQKYTFSFSKRCFYFTP  |
|     | :     :        .     : .     .:                               |
| 121 | KKHTWNGCFQACAELYPCTYFYGPTPDILPVVTRNLNAIESLWVG VYRVGEGNWTSLDGG |
|     | .   .   .     .     :        .     :                          |
| 120 | QKHPWDGCFKACAELYECTYFYGPTANILPVVTGNLKAESLWVG VYKVGEKNWTSLDGG  |
|     | :     :        .     : .     .:                               |
| 181 | TFKVYQIFGSHCTYVSKFSTVPVSHHECSFLKPCLCVSQRSNS                   |
|     | :.     .     .     .     : .:                                 |
| 180 | NYQVYQIFGSHCTYVSKSSKVPVSHHECSFHKPCLCVSHRKD                    |
|     | :     :        .     : .     .:                               |

**B**

EBV-gp42-44-81aa:rhLCV-gp42-43-80aa  
Identity= 71.05% (27/38)

|   |                                        |
|---|----------------------------------------|
| 1 | WVPKPNVEVWPVDPPPPVNFNKTAEQEYGDKEVKLPHW |
|   | : .     .  :     .     .  : .          |
| 1 | WVANPKVEVWPAEPPPIDFNKTAEQEYGKPEIDLPHW  |
|   | :     :        .     : .     .:        |

**Figure S3. Alignment of EBV (Genbank ID: KF373730.1) and rhLCV (Genbank ID: AY037858) gp42 using DNAMAN.**

(A) Full-length sequence and (B) N-terminal sequence of gp42 were analyzed. The identical amino acid was linked with vertical line.

**A**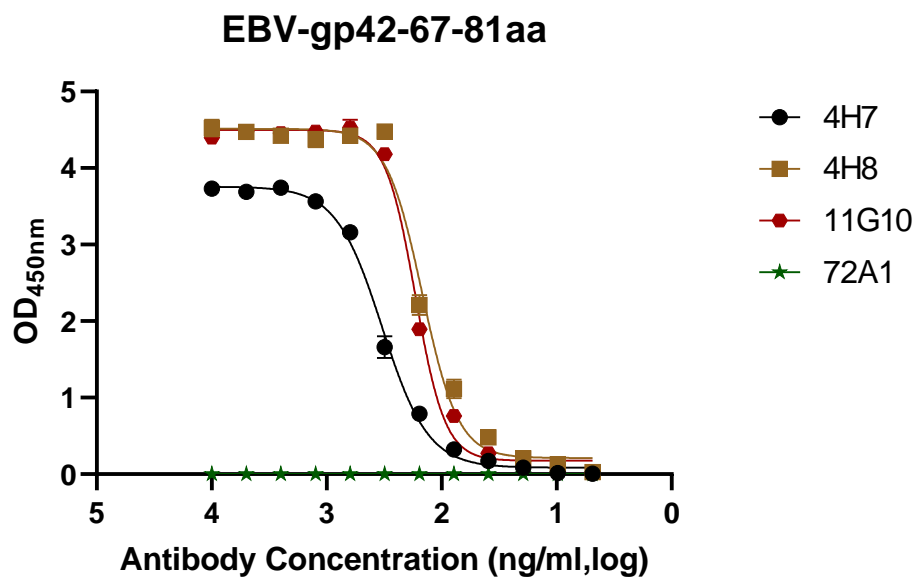**B**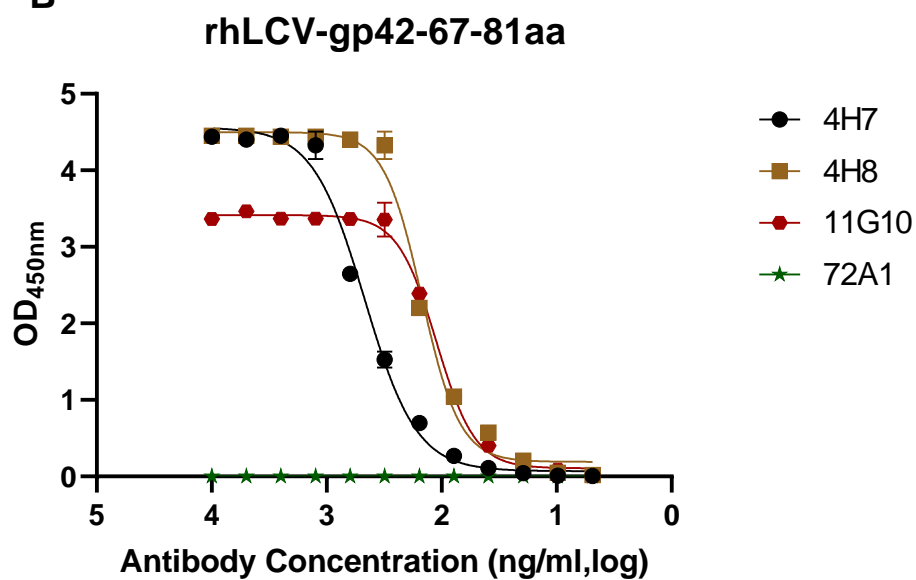

**Figure S4. The reactivity of 4H7, 4H8 and 11G10 with synthetic peptides, (A) EBV-gp42(residues 67-81) and (B) rhLCV-gp42(residues 66-80).**

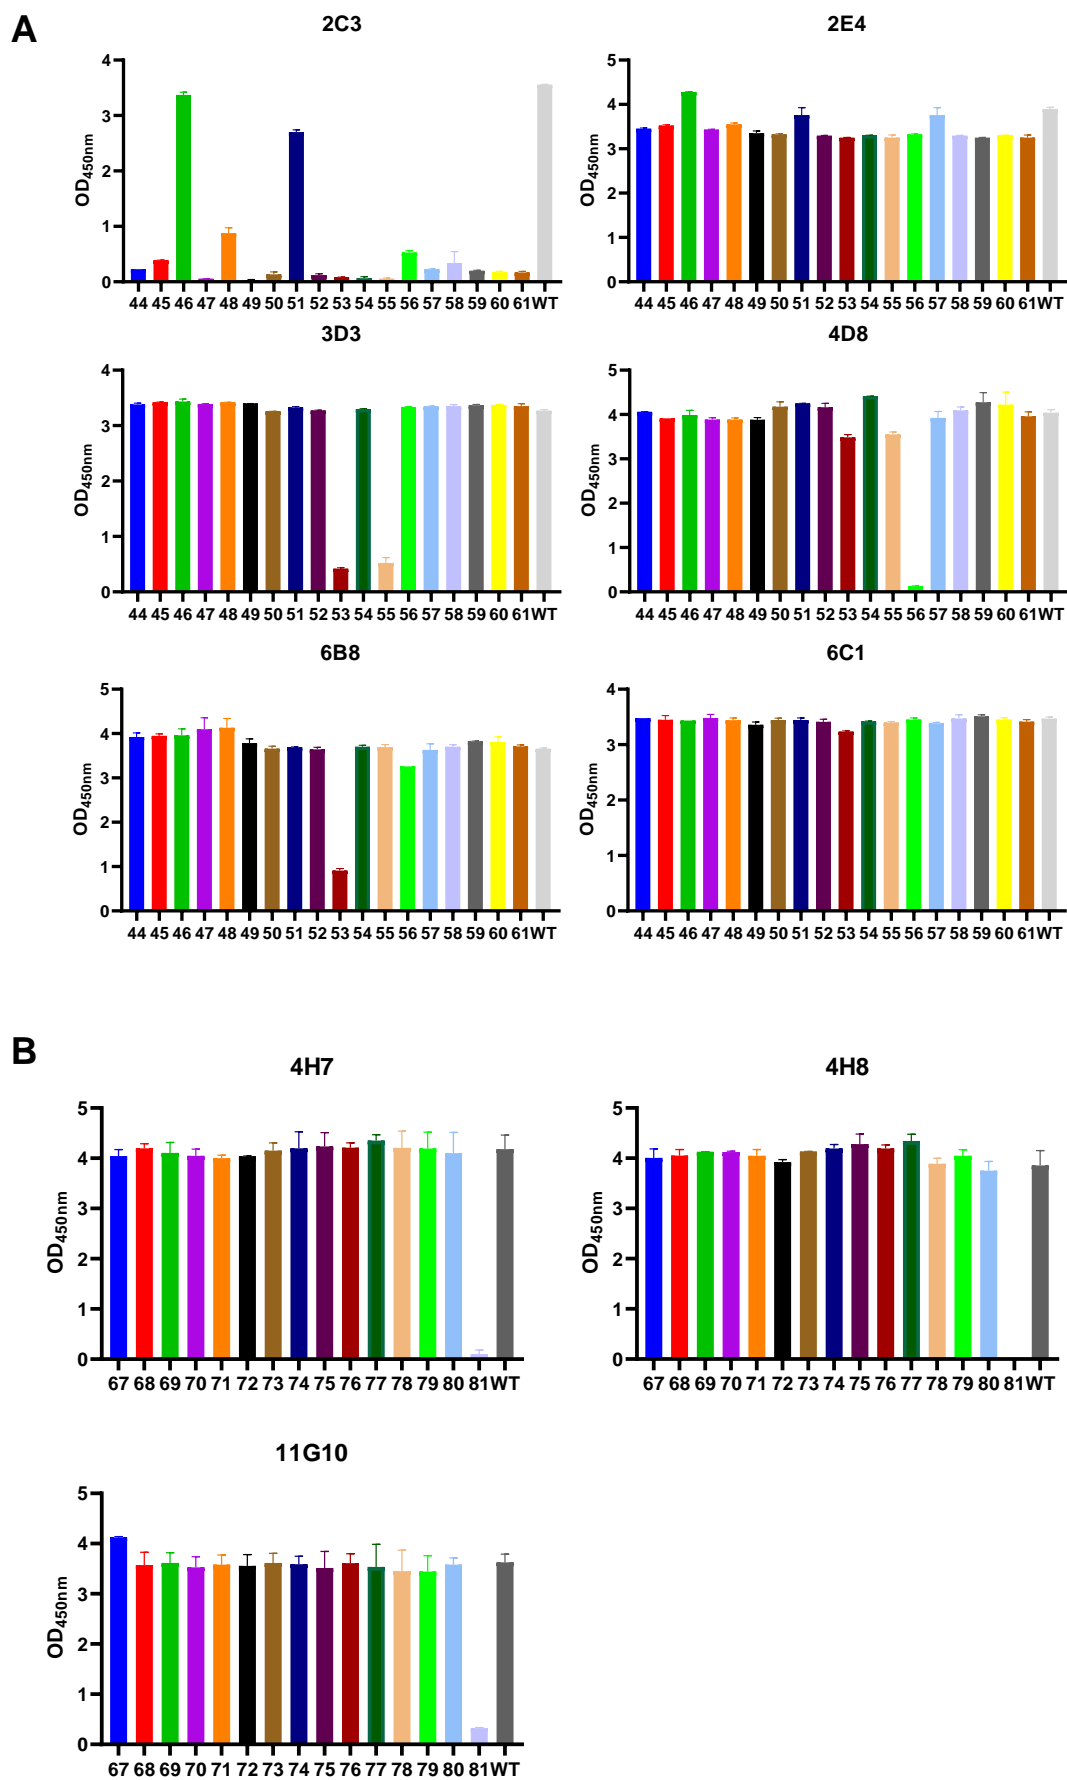

**Figure S5. Alanine-scanning mutagenesis of gp42 N-terminal peptides. (A) gp42-44-61aa. (B) gp42-67-81aa.**

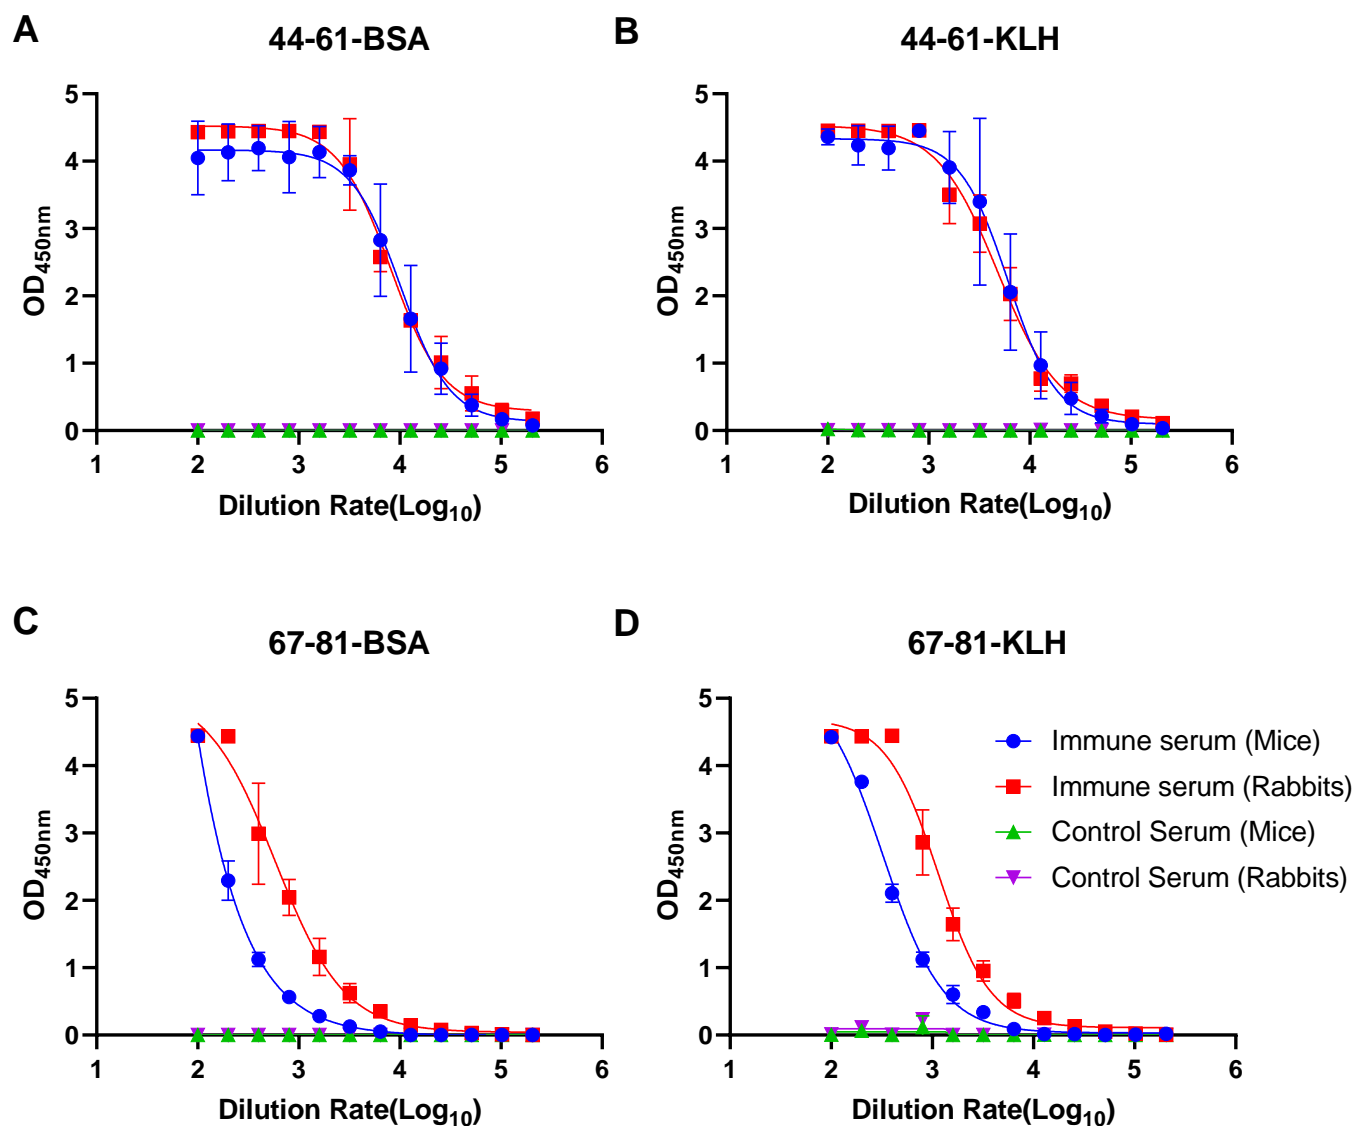

**Figure S6.** The reactivity of immune serum derived from mice immunized with gp42 proteins against BSA and KLH conjugated peptides, (A) and (B) gp42(residues 44-61), (C) and (D) gp42(residues 67-81).

**A**

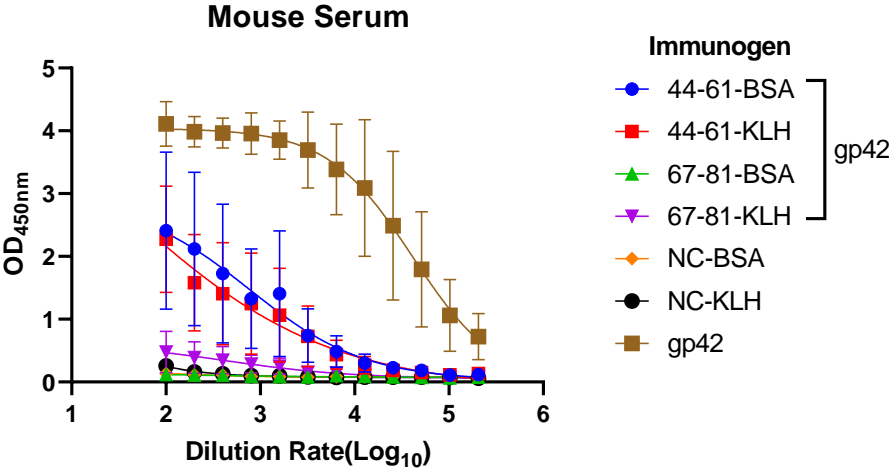

**B**

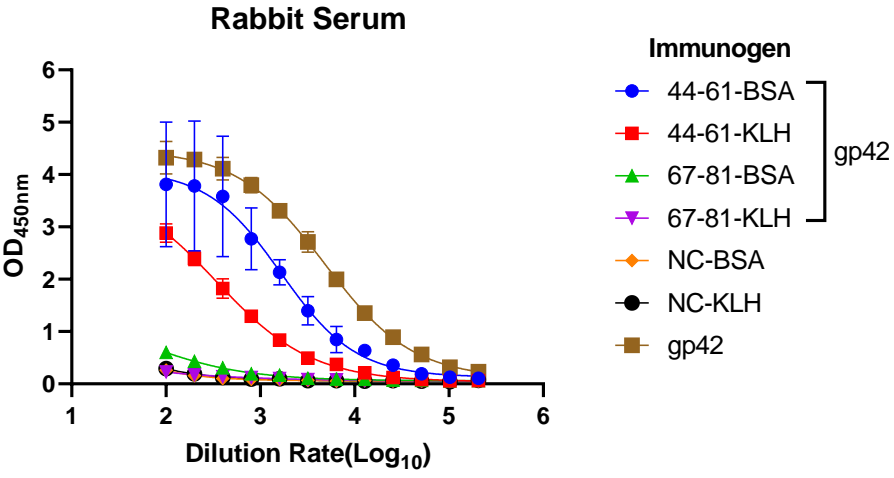

**Figure S7. Immunized serum titers against gp42. (A) Mice and (B) rabbits immunized with KLH, BSA conjugated peptides.**

**A**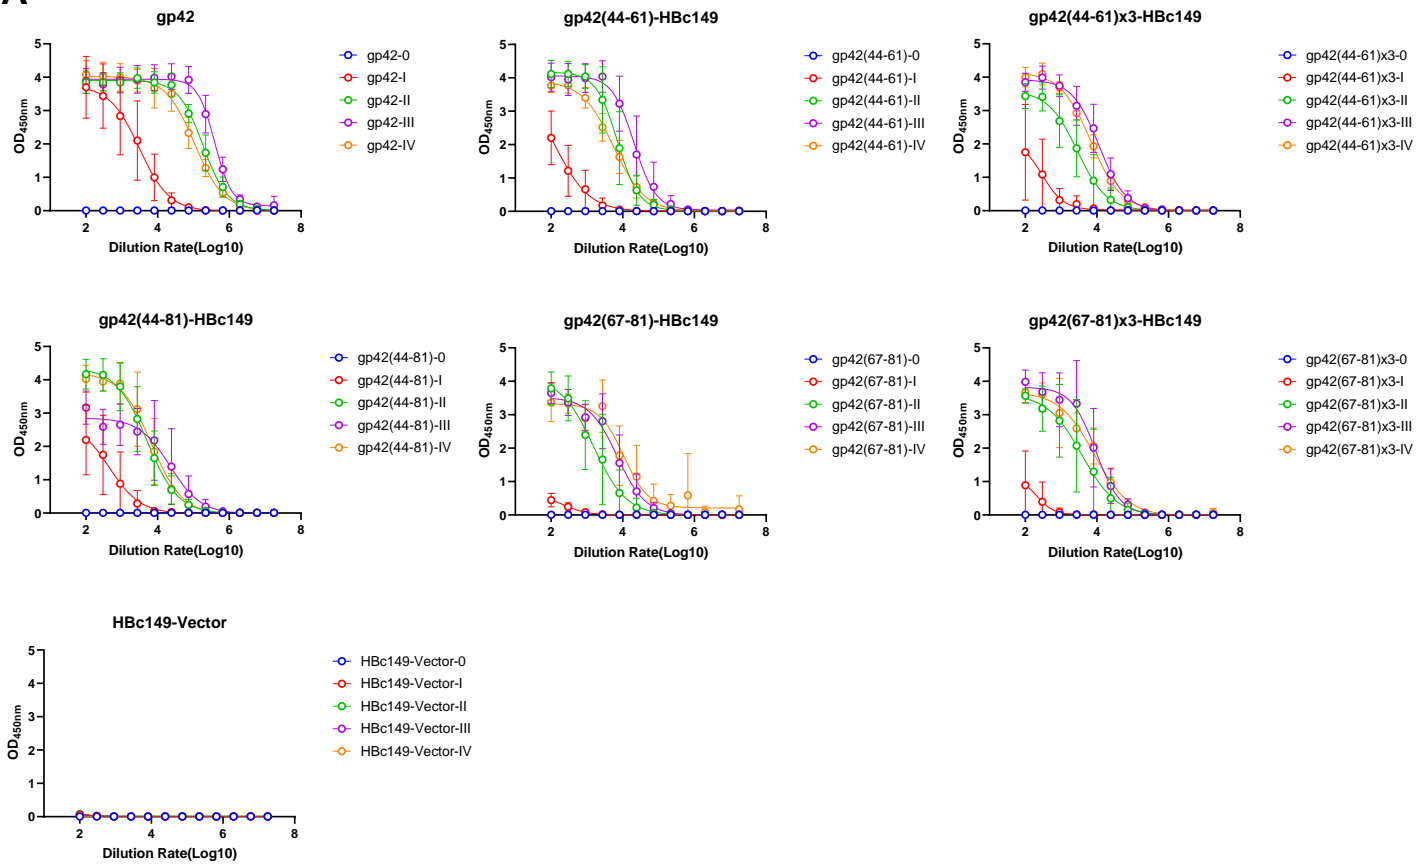**B**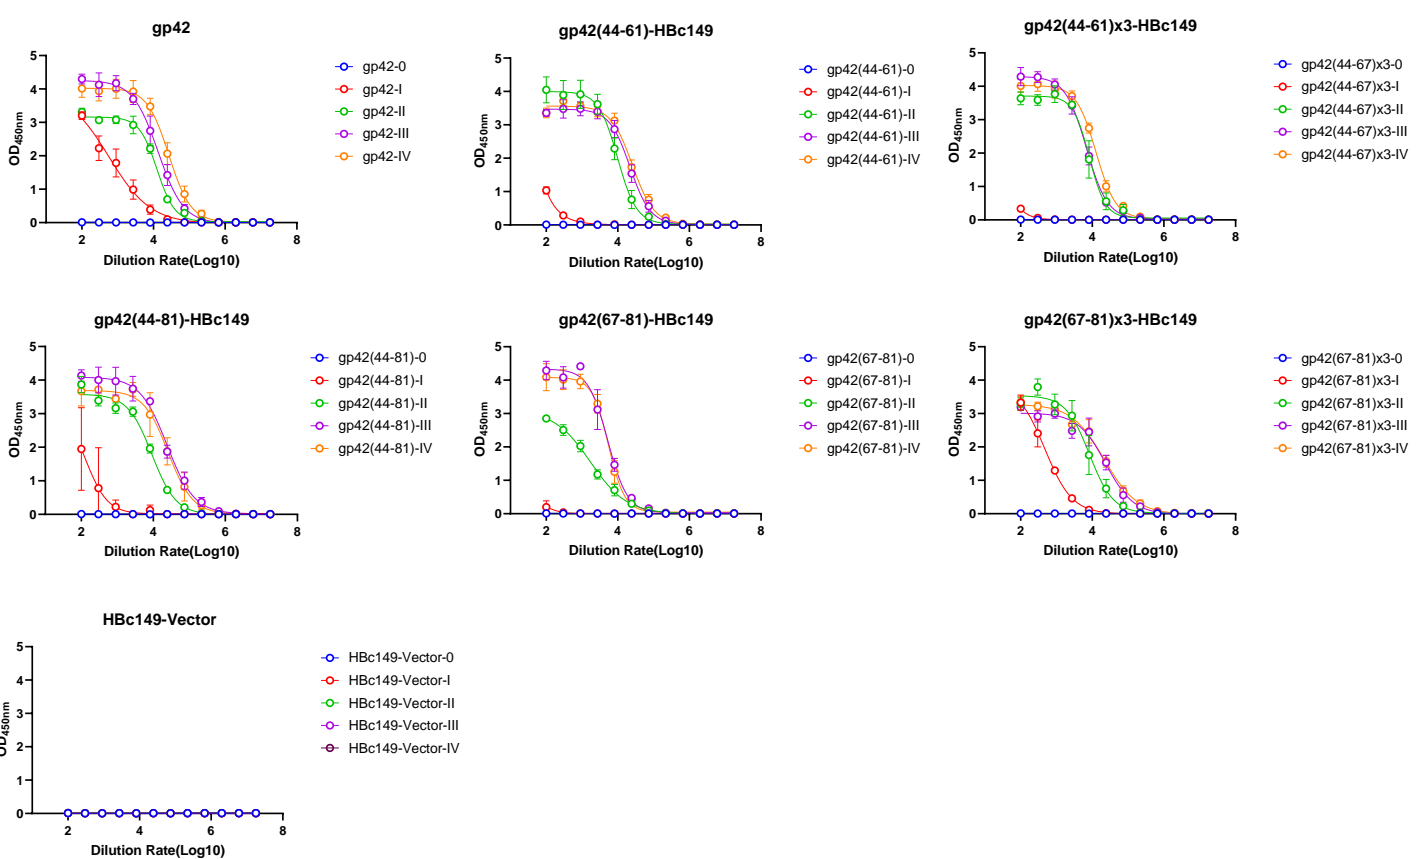

**Figure S8. Antibody titers against gp42. (A) Mice and (B) rabbits immunized with chimeric VLPs carrying peptides derived from gp42 N-terminal region.**



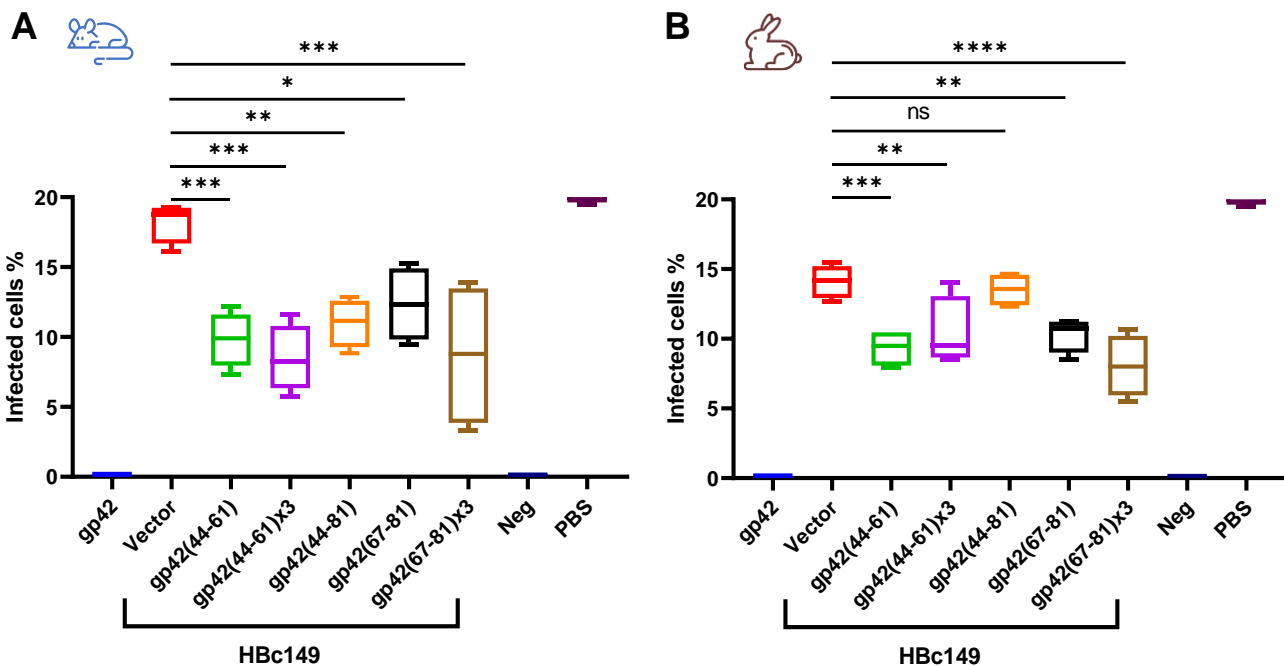

**Figure S9. Serum samples collected at week 8 from (A) mice and (B) rabbits to block EBV infection into Akata cells. (\* $p \leq 0.05$ , \*\* $p \leq 0.01$ , \*\*\* $p \leq 0.001$ )**
